# Supplementary material for: Peatland development reconstruction and complex soil biological responses to permafrost thawing in Western Siberia
Source: Copernicus journal article supplement (doi:10.5194/egusphere-2025-1422), 2025-04-03
Supplement: Supplementary file 1 [file egusphere-2025-1422-supplement.pdf]

## Supplementary material

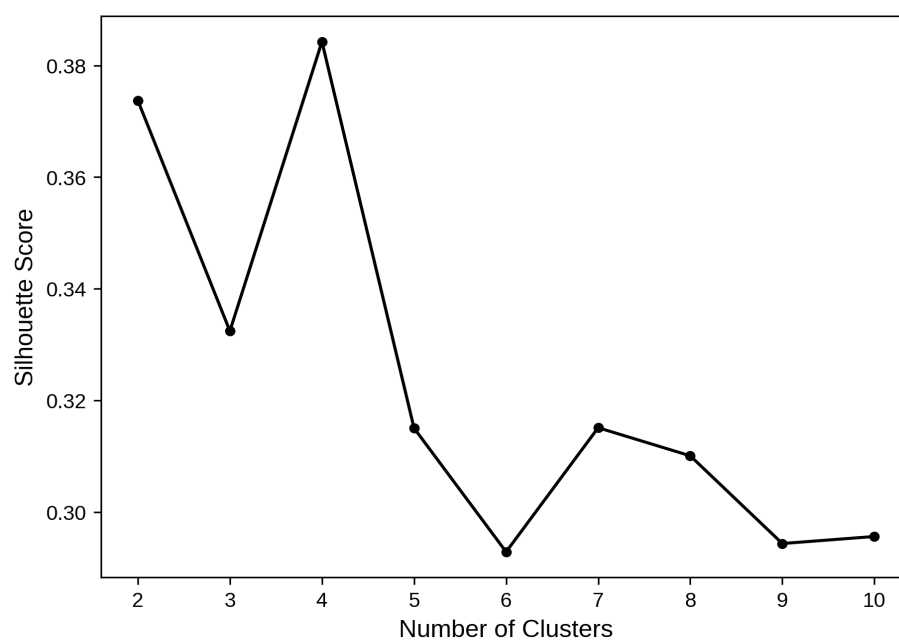

**Figure 1** Silhouette Score for different number of clusters in testate amoebae samples from the Kh-K1 core. The highest silhouette score is observed at four clusters.
